# Supplementary material for: Age-related loss of Notch3 underlies brain vascular contractility deficiencies, glymphatic dysfunction, and neurodegeneration in mice
Source: PubMed Central journal article supplement (PMC10786701; doi:10.1172/jci166134), 2024-01-16

# Full unedited gel for Figure 4E – 1 Month Samples

Phospho-Myosin Light Chain 2 (Ser19) Antibody #3671 Cell Signaling Technology

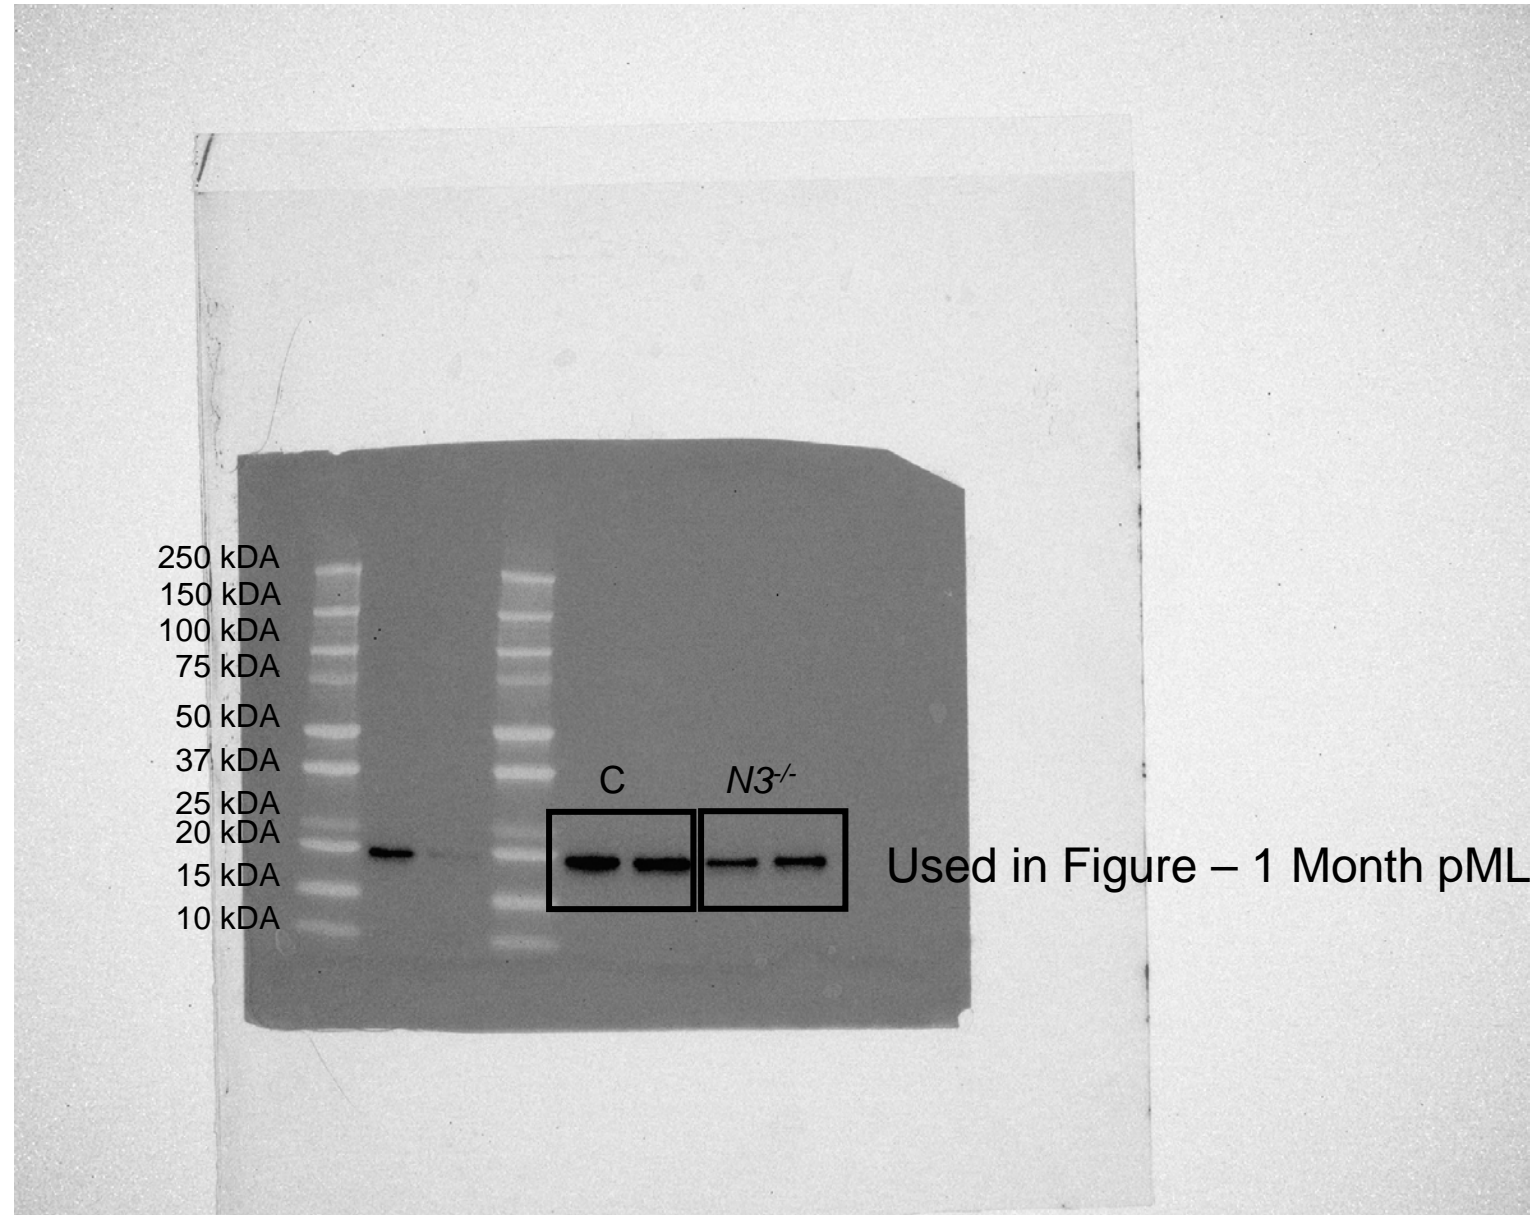

**Full unedited gel for Figure 4E – 1 Month Samples**  
Myosin Light Chain 2 (D18E2) #8505 Cell Signaling Technology

250 kDA  
150 kDA  
100 kDA  
75 kDA  
50 kDA  
37 kDA  
25 kDA  
20 kDA  
15 kDA  
10 kDA

C

*N3<sup>-/-</sup>*

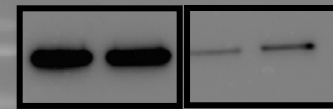

Used in Figure – 1 Month MLC2

**Full unedited gel for Figure 4E – 1 Month Samples**  
Calponin1 ab46794 - Abcam

250 kDA  
150 kDA  
100 kDA  
75 kDA  
50 kDA  
37 kDA  
25 kDA  
20 kDA  
15 kDA  
10 kDA

C

*N3<sup>-/-</sup>*

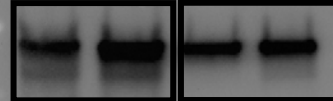

Used in Figure – 1 Month Calponin

Full unedited gel for Figure 4E – 1 Month Samples  
Lamin A ab26300 - Abcam

250 kDA  
150 kDA  
100 kDA  
75 kDA  
50 kDA  
37 kDA  
25 kDA  
20 kDA  
15 kDA  
10 kDA

C

*N3<sup>-/-</sup>*

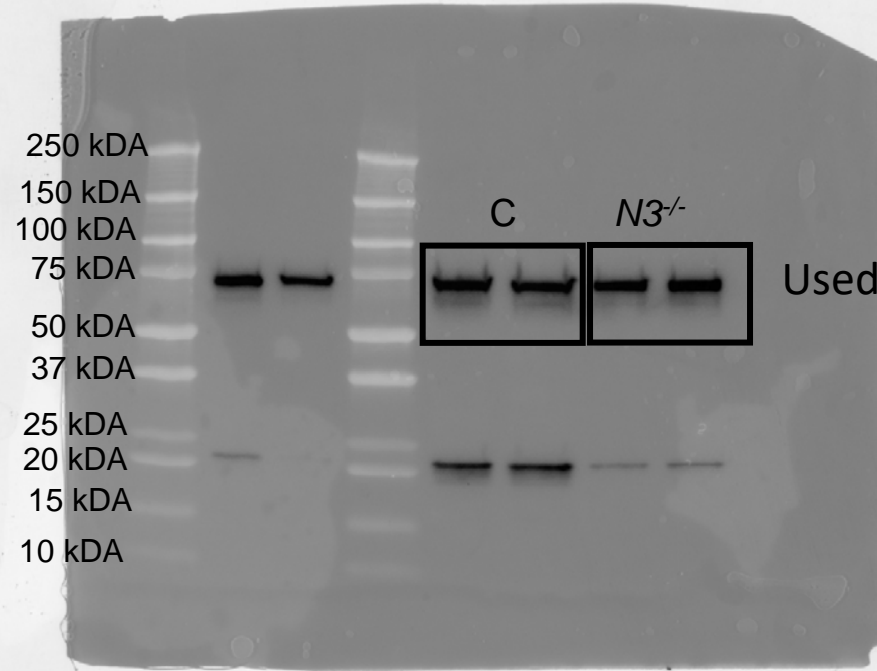

Used in Figure – 1 Month Lamin A

**Full unedited gel for Figure 4E – 6 + 12 Month Samples**  
Phospho-Myosin Light Chain 2 (Ser19) Antibody #3671 Cell Signaling Technology

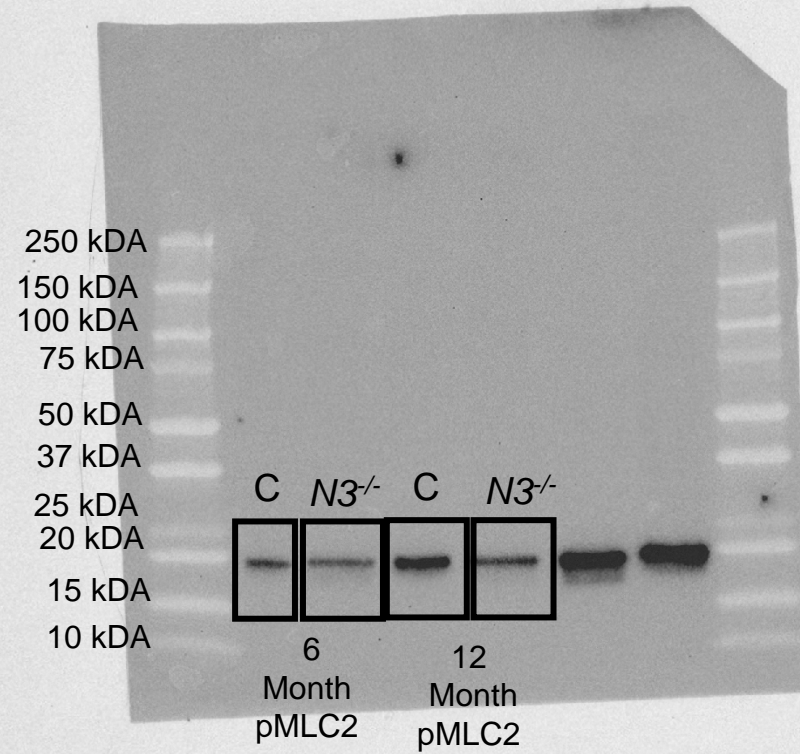

**Full unedited gel for Figure 4E – 6 + 12 Month Samples**  
Myosin Light Chain 2 (D18E2) #8505 Cell Signaling Technology

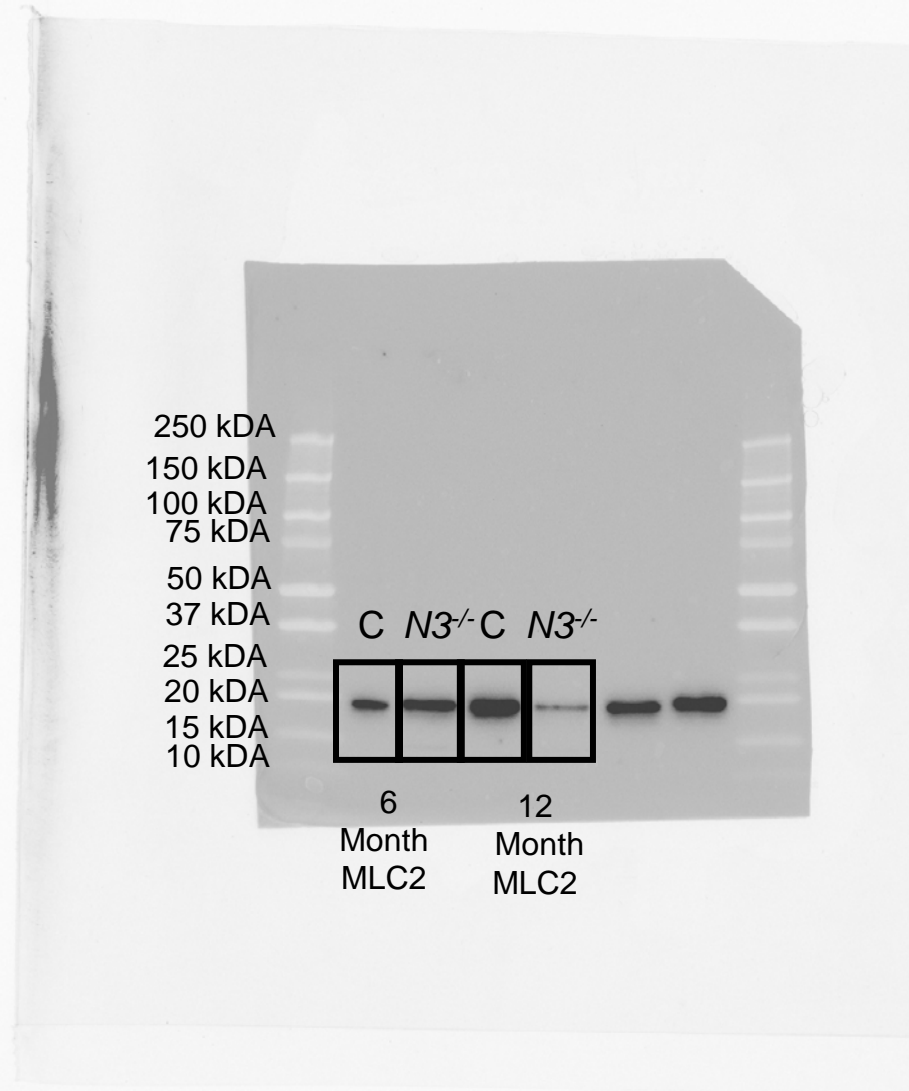

**Full unedited gel for Figure 4E – 6 + 12 Month Samples**  
Calponin1 ab46794 - Abcam

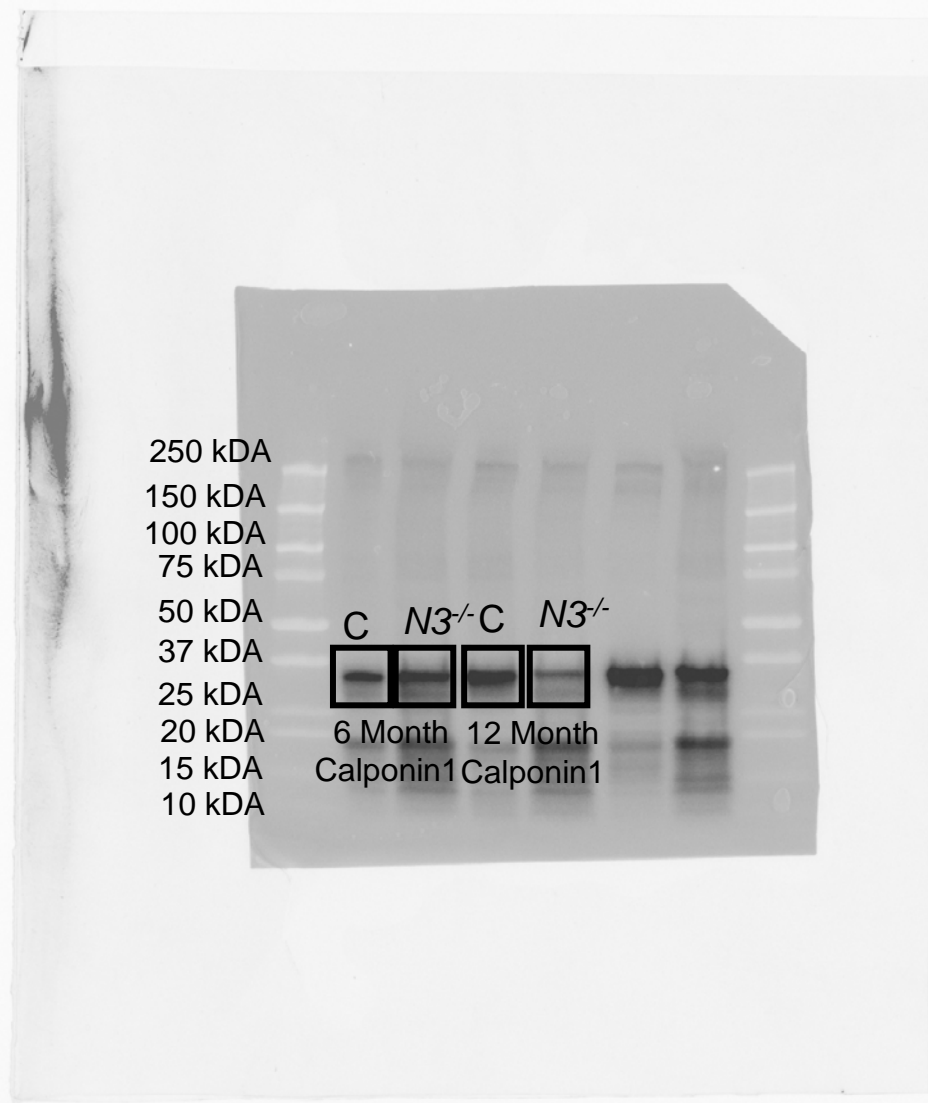

**Full unedited gel for Figure 4E – 6 + 12 Month Samples**  
Lamin A ab26300 - Abcam

250 kDA  
150 kDA  
100 kDA  
75 kDA  
50 kDA  
37 kDA  
25 kDA  
20 kDA  
15 kDA  
10 kDA

| C               | <i>N3<sup>-/-</sup></i> | C                | <i>N3<sup>-/-</sup></i> |  |
|-----------------|-------------------------|------------------|-------------------------|--|
|                 |                         |                  |                         |  |
| 6 Month Lamin A |                         | 12 Month Lamin A |                         |  |

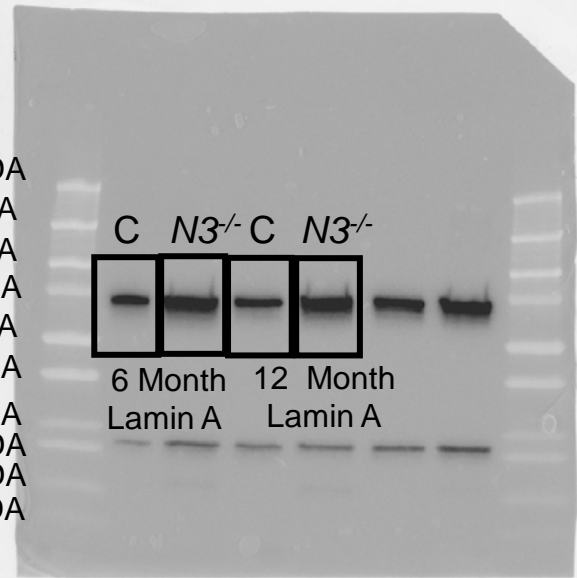



**Full unedited gel for Supplemental Figure 11 – 1 Month Samples**  
Phospho-Myosin Light Chain 2 (Ser19) Antibody #3671 Cell Signaling Technology

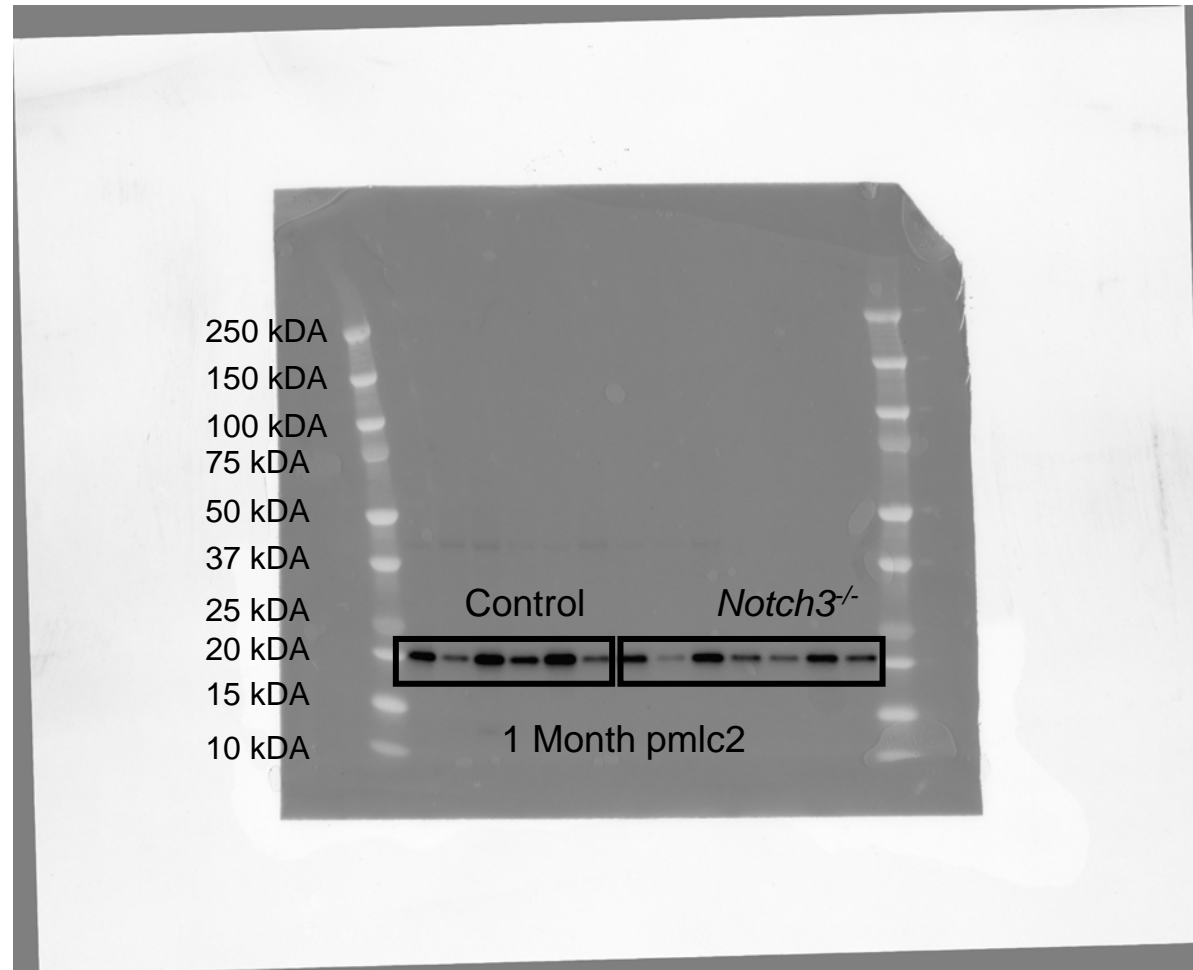

**Full unedited gel for Supplemental Figure 11 – 1 Month Samples**

Myosin Light Chain 2 (D18E2) #8505 Cell Signaling Technology

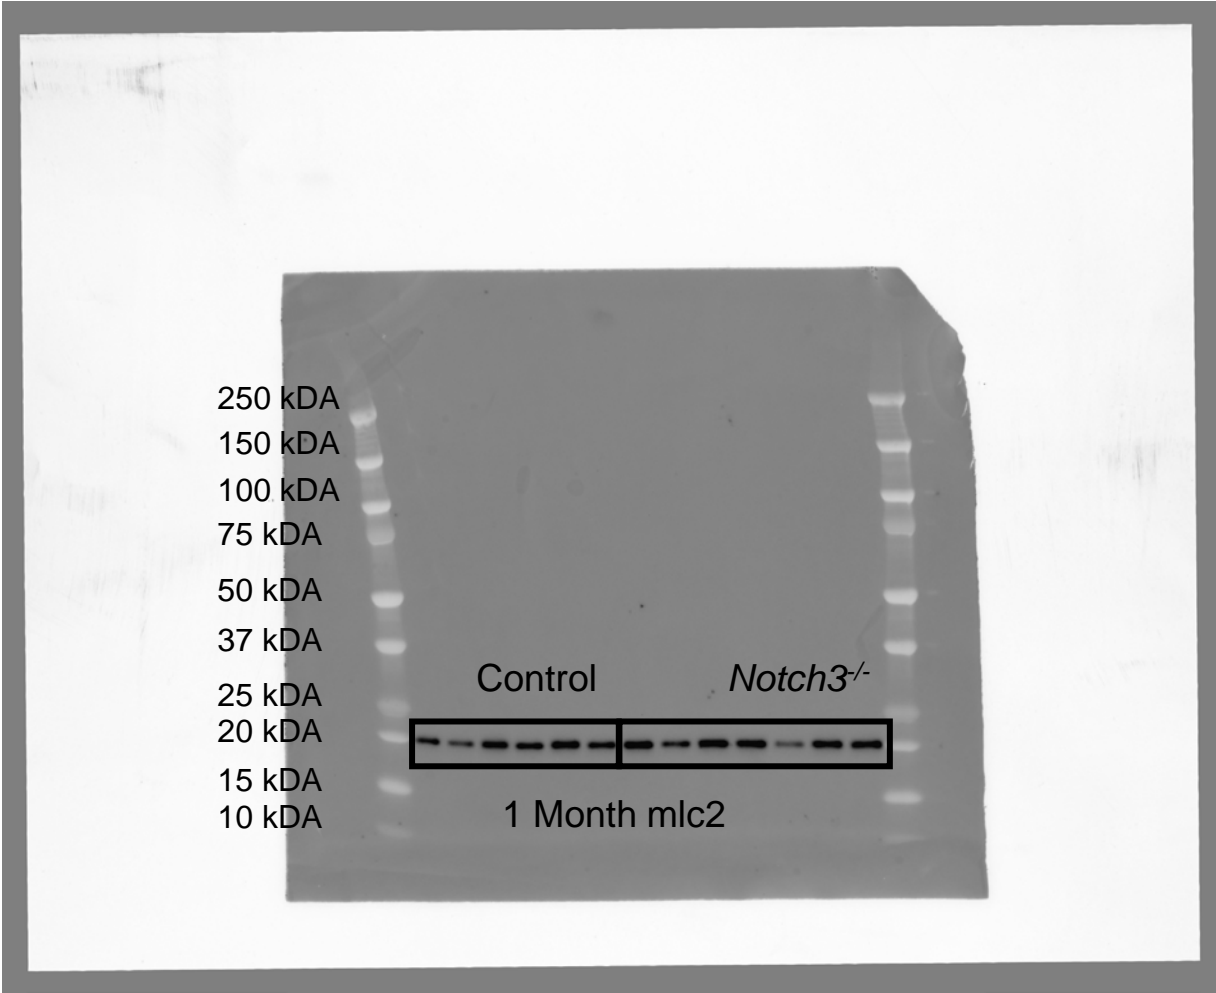

**Full unedited gel for Supplemental Figure 11 – 1 Month Samples**

Calponin1 ab46794 – Abcam

Lamin A ab26300 - Abcam

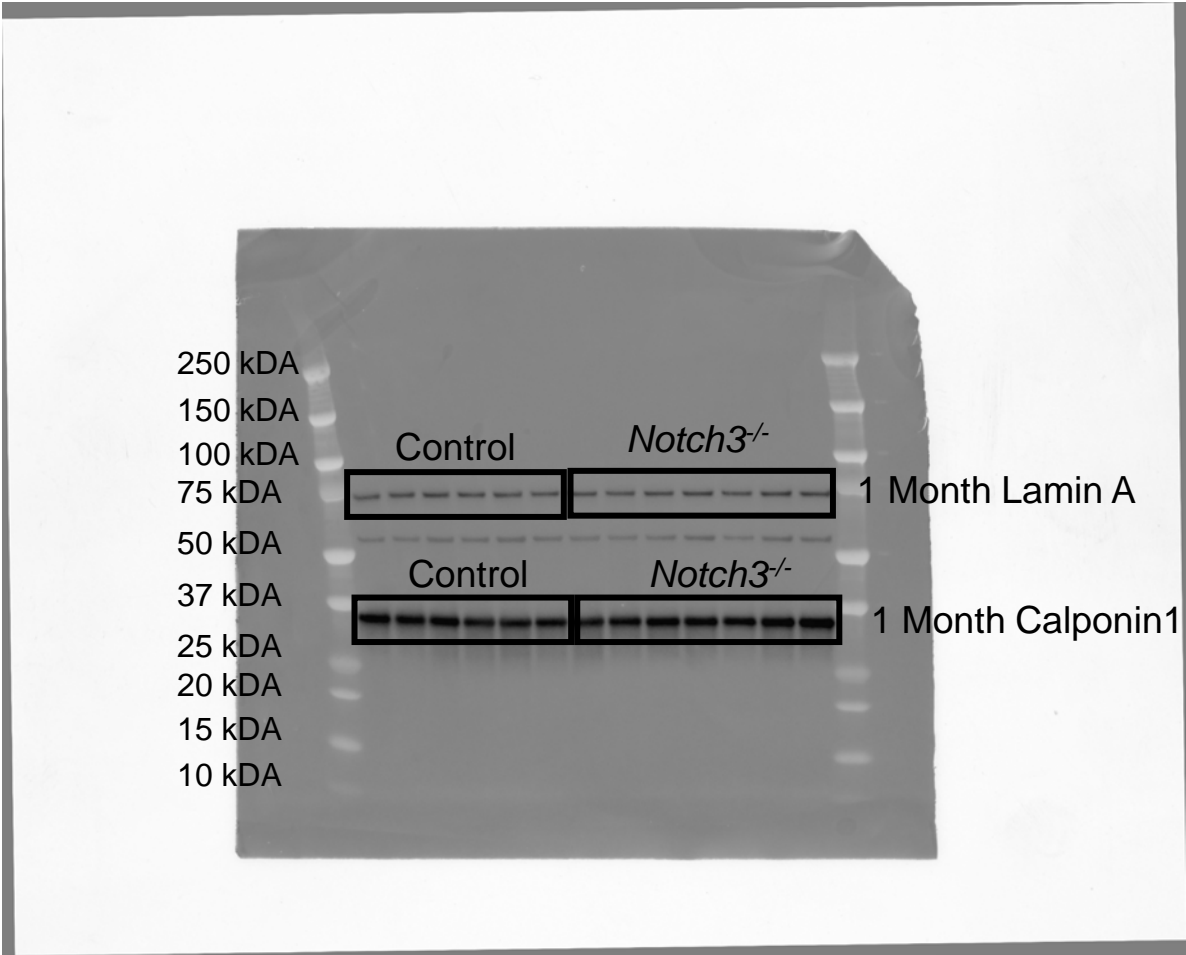

Supplement: jci-134-166134-s236.pdf [file jci-134-166134-s236.pdf]
